# Supplementary material
Source: PubMed Central journal article supplement (PMC2737827)
Supplement: NIHMS114721-supplement-supplement_1.pdf [file NIHMS114721-supplement-supplement_1.pdf]

**Supplemental Table 1. Kinetic parameter estimates of model C.**

| Parameter | Notes                           | Final Value           | Clearance,<br>L/hr | Half-life,<br>hr |
|-----------|---------------------------------|-----------------------|--------------------|------------------|
| $k_{1fT}$ | TCE→TCA formation               | 0.0271                | -                  | -□               |
| $k_{Te}$  | TCA elimination                 | 0.0563                | 0.00336            | 12.3             |
| $V_{mT}$  | Volume of distribution for TCA  | 0.0598                | -                  | -                |
| $k_{TfD}$ | TCA→DCA formation               | $1.53 \times 10^{-6}$ | -                  | -                |
| $K_{1fD}$ | TCE→DCA formation               | $7.96 \times 10^{-8}$ | -                  | -                |
| $k_{De}$  | DCA elimination                 | 8.65                  | 0.00050            | 0.080            |
| $V_{mD}$  | Volume of distribution for DCA  | $5.79 \times 10^{-5}$ | -                  | -                |
| $k_{1fG}$ | TCE→DCVG formation              | $4.39 \times 10^{-6}$ | -                  | -                |
| $k_{GfC}$ | DCVG→DCVC formation             | 0.492                 | 0.0178             | 1.41             |
| $V_{mG}$  | Volume of distribution for DCVG | 0.0361                | -                  | -                |
| $k_{Ce}$  | DCVC elimination                | 0.603                 | 0.187              | 1.15             |
| $V_{mC}$  | Volume of distribution for DCVC | 0.309                 | -                  | -□               |
| $k_{1fT}$ | TCE→TCA formation               | 0.0271                | -□                 | -□               |

Clearance is the product between elimination constant and volume of distribution of each metabolite, reflecting systemic clearance. Units of the reaction constants and volume of distributions are  $\text{hr}^{-1}$  and liter, respectively. Parameter estimates of parent compound can be found in Table 4.
